# Supplementary material for: Brain transcriptomic, metabolic and mitohormesis properties associated with N-propargylglycine treatment: A prevention strategy against neurodegeneration
Source: PubMed Central journal article supplement (PMC11283822; doi:10.1016/j.brainres.2023.148733), 2023-12-20
Supplement: NIHMS1958532-supplement-MMC1.pdf [file NIHMS1958532-supplement-MMC1.pdf]

## Supplementary Figure Legends

**Supplementary Figure S1.** Additional evidence from Figure 2 supporting the conclusion that *N*-PPG (50 mg/kg x 9 days) induced partial normalization of HD brain transcriptomes and pathways toward WT. **A.** Pearson's linear correlation ( $R_p = +0.75$ ,  $p < 0.05$ ) between Log<sub>2</sub>-fold changes (Log<sub>2</sub>FC) in treated HD/control HT (HT/H) and control WT/HD (W/H) mean gene ratios ( $n=1611$  SDE gene set, Suppl. Table S1). **B.** Normalization of set of 1611 SDE mean gene ratios with inset of heat map showing extent of normalization for three mouse brain transcripts (Th, *Drd1*, *Adora2a*) known to be dysregulated during HD disease progression and significantly downregulated in Veh treated R6/2 mice relative to Veh treated WT mice. **C.** Gene set enrichment analysis (GSEA) showing normalized enrichment scores (NES) from transcriptomes of *N*-PPG vs. vehicle treated WT mouse brains. **D.** Statistical excess of overlapping GSEA pathways (up- and down-regulated) indicating pathway normalization in *N*-PPG treated HD (R6/2) mouse brains relative toward those of WT mouse brains.

**Supplementary Figure S2.** Repeated weight, motor performance and survival measurements of HD R6/2 mice orally gavaged with either Veh ( $n=9$ ) or 50 mg/kg *N*-PPG ( $n=8$ ) for 14 days (also schematically shown in Figure 3A). **A.** No significant change in body weights during or after Veh or *N*-PPG treatments. **B.** No significant change in median 14.3 weeks of survival after Veh or *N*-PPG treatments. **C.** No significant change in metabolic cage measurement at 12 weeks of overall O<sub>2</sub> consumption, CO<sub>2</sub> production, food consumption or energy expenditure. **D.** No significant change in grip strength, rotarod coordination or hindlimb clasp measured at indicated time points during and after Veh or *N*-PPG treatments.

**Supplementary Figure S3.** Breakdown of all metabolites commonly measured in tissues (blood, brain/cerebellum, kidney) of Veh and *N*-PPG treated HD R6/2 mice, as schematically shown in Figure 3A. Of the 536 tissue analytes quantifiable by our metabolomic platform, 260 were common to all three tissue types; the 39 classified as either amino acids or amino acid-related metabolites were the subject of further analysis (Figure 3B, Suppl. Table S3).

**Supplementary Figure S4.** Differential metabolic cage effects on WT mice during and after *N*-PPG treatments (Veh, 100 mg/kg, or 200 mg/kg daily x 8 weeks followed by 8 weeks off all treatments), schematically shown in Figure 6A. During treatment cage measurements showed significant *N*-PPG induced increases in CO<sub>2</sub> production, O<sub>2</sub> consumption, and energy expenditure (kcal/h), which largely reversed by 8 weeks after treatment cessation.

**Supplementary Figure S5.** Unsupervised clustering of the amino acid-related metabolites measured in blood, brain (cerebellum) and kidney tissues of WT mice collected 8 weeks after Veh or *N*-PPG (100 mg/kg) treatment, schematically shown in Figure 6A. Only the blood samples showed significant changes in proline, sarcosine and 20 other amino acid-related metabolites, suggesting a complex systemwide rebound response to the earlier *N*-PPG treatment.

# Suppl. Figure S1

## A

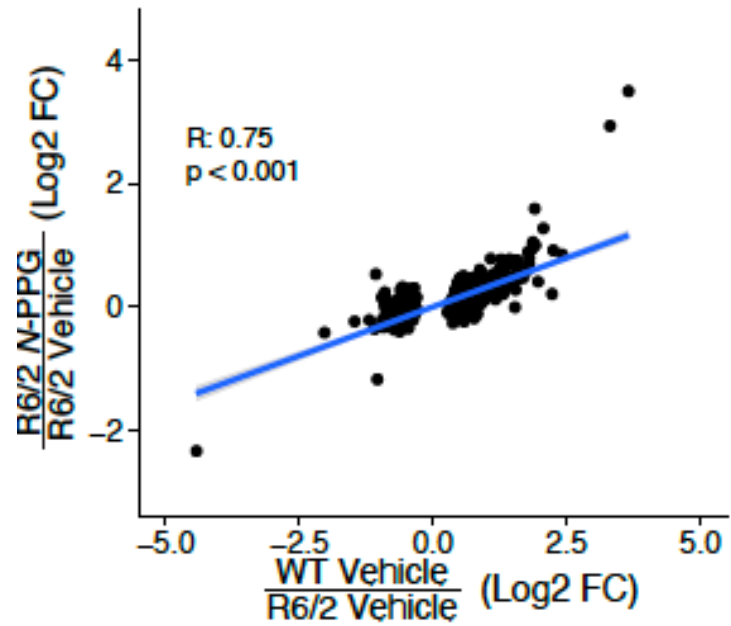

## B

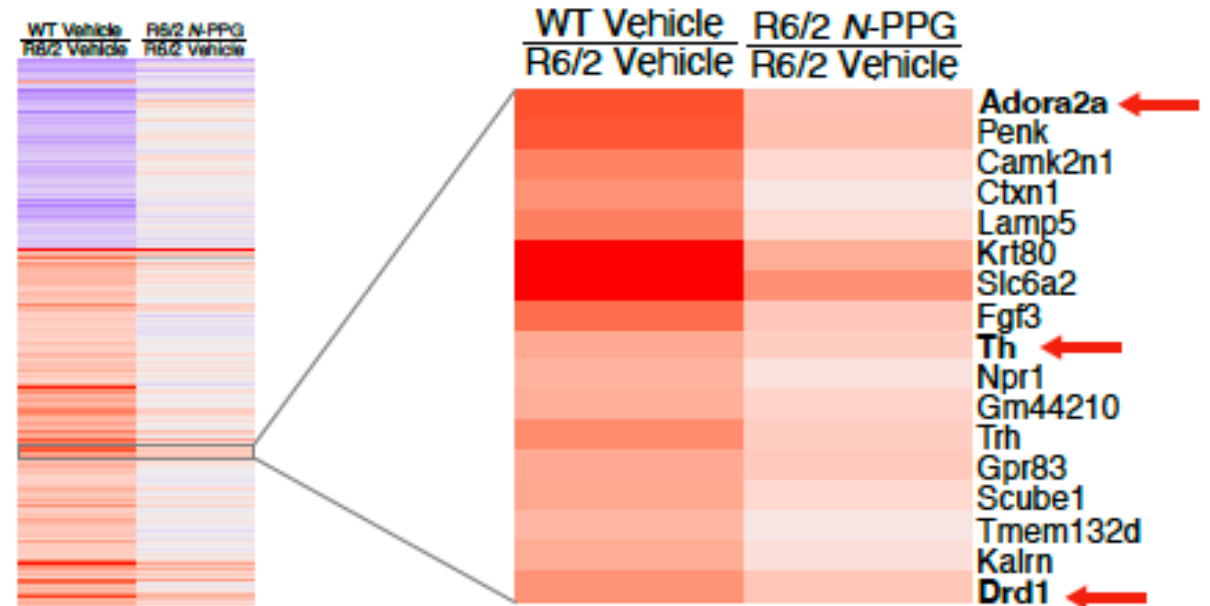

## C

Brain transcriptome GSE Normalized Enrichment Scores (NES): WT N-PPG vs. WT Vehicle treated

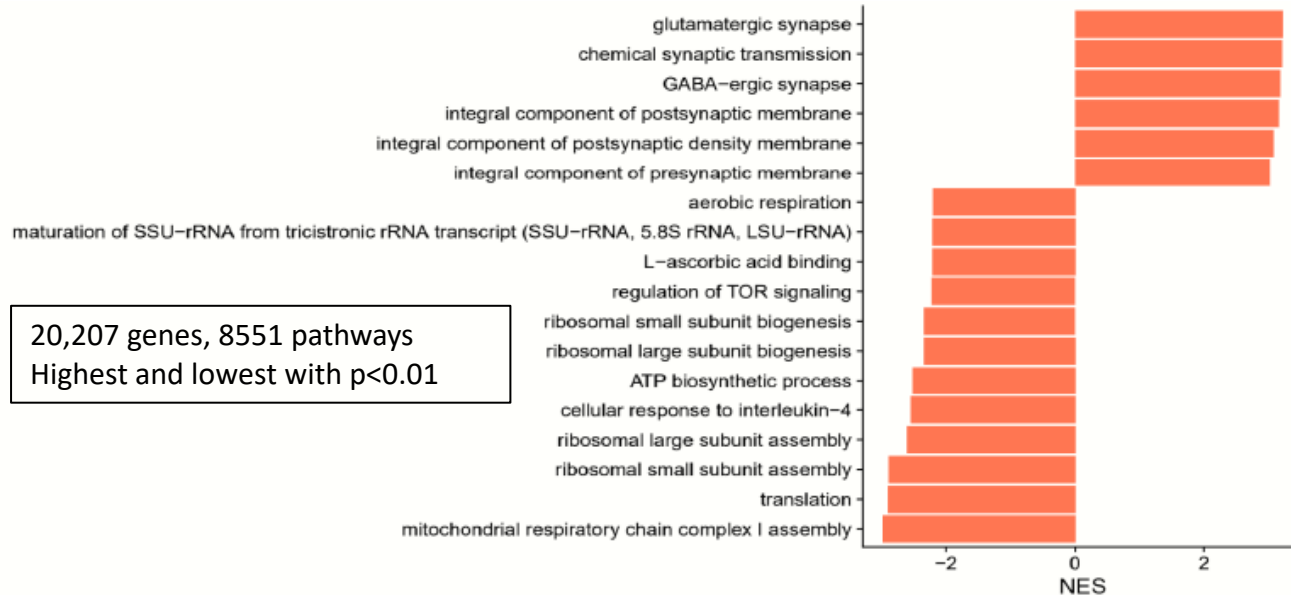

## D

Excess overlap of brain transcriptome GSEA pathways between R6/2 N-PPG vs. R6/2 Vehicle and WT Vehicle vs. R6/2 Vehicle mice

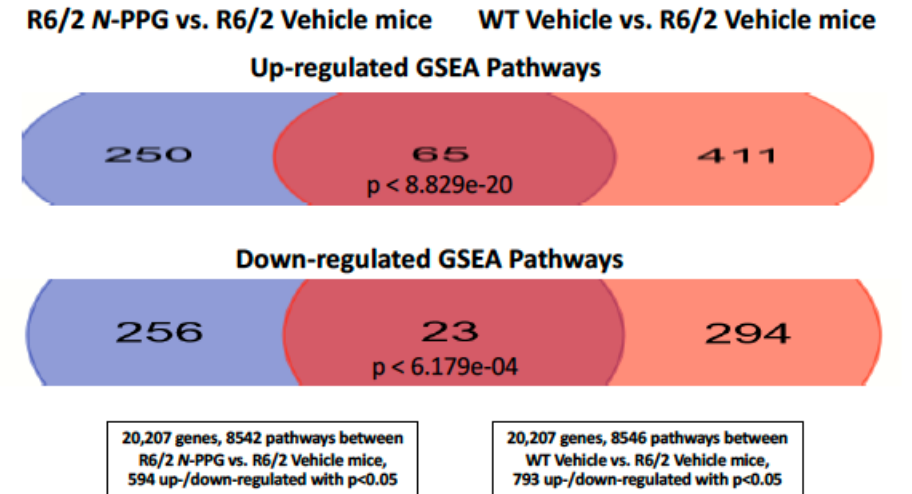

# Suppl. Figure S2

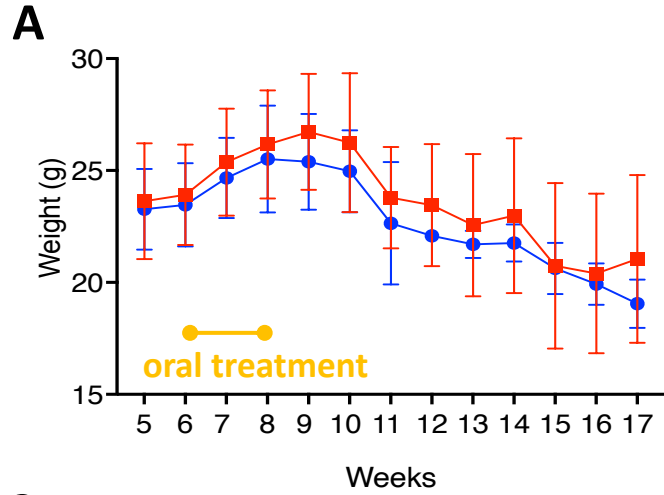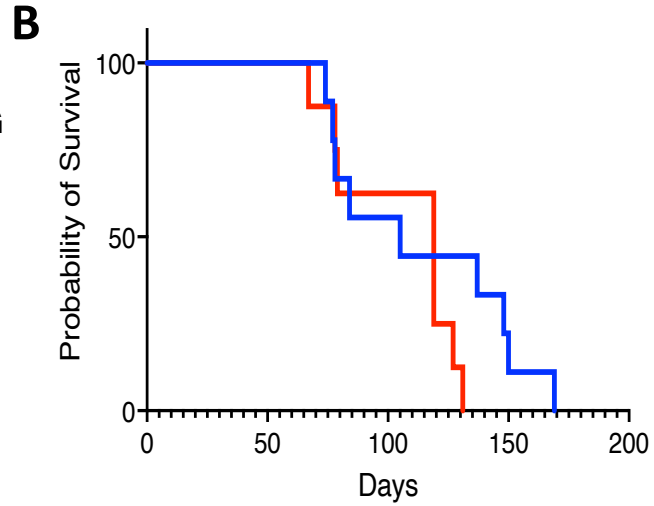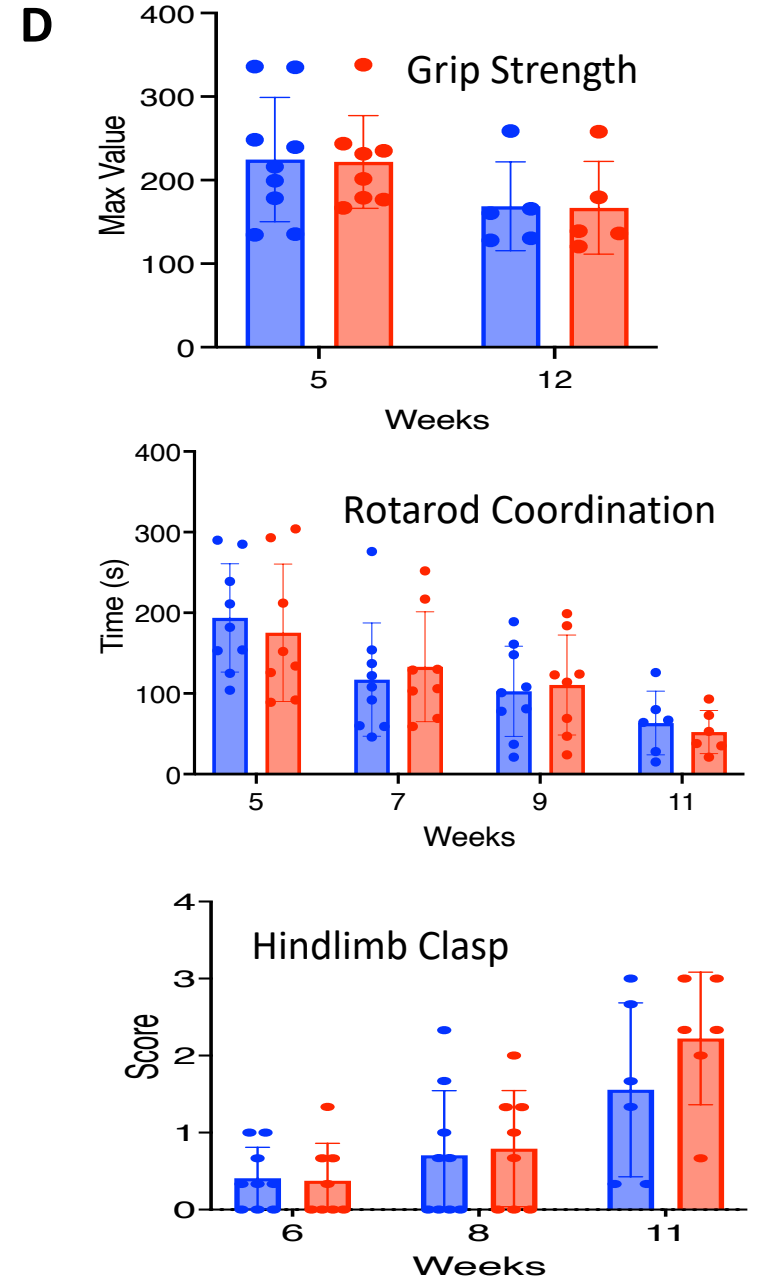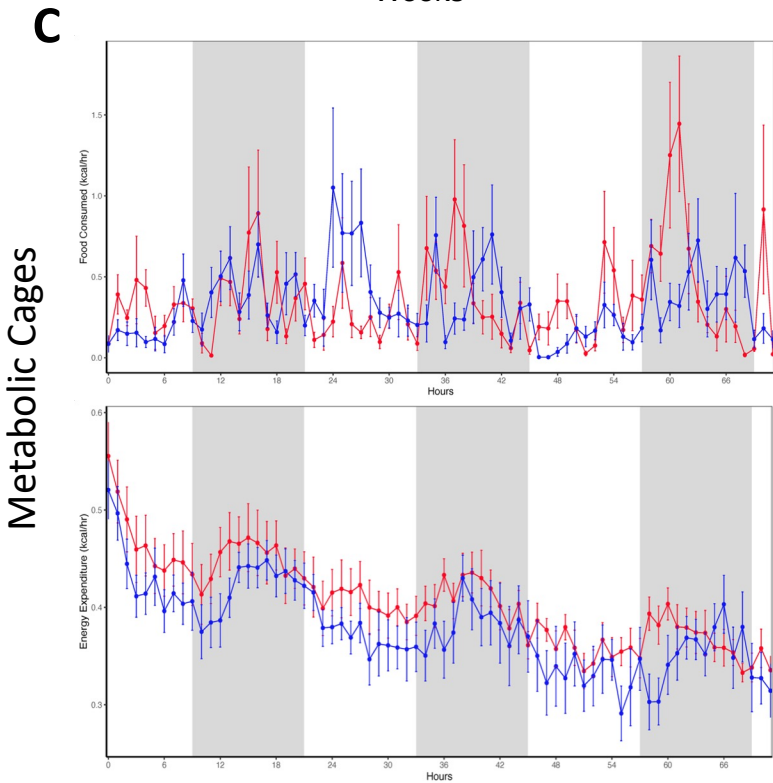

Suppl. Figure S3

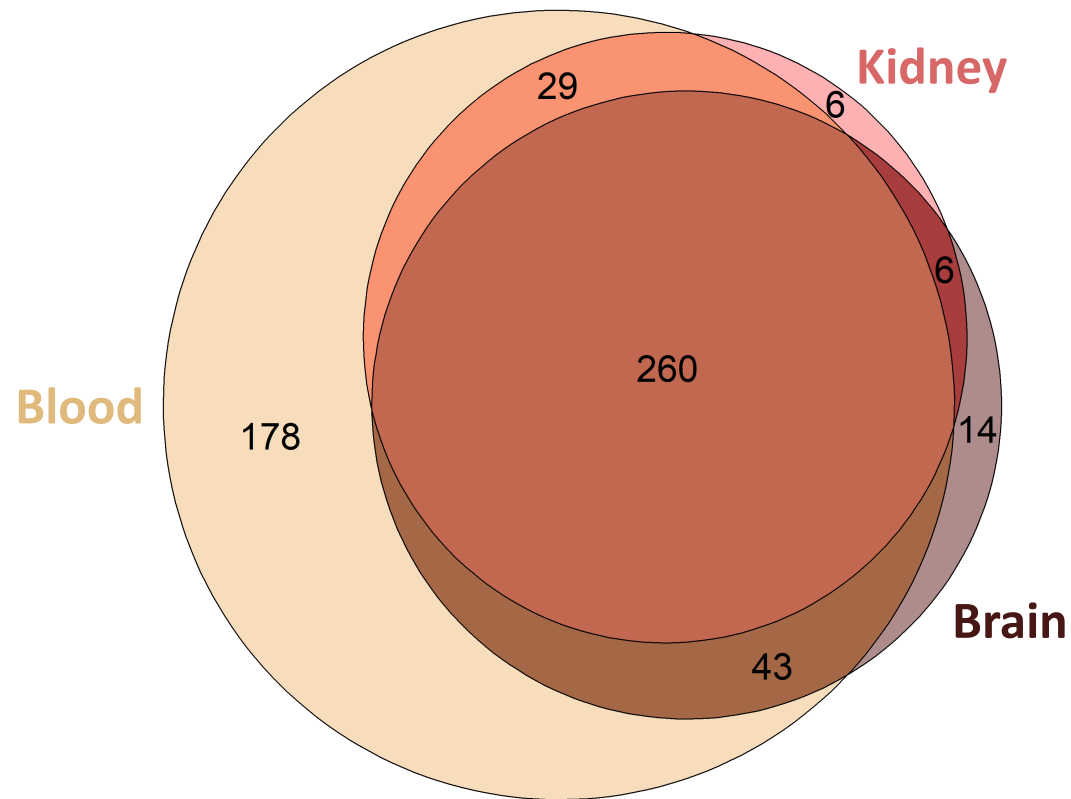

**260 common to blood, brain and kidney**

| Class                | Number of metabolites |
|----------------------|-----------------------|
| Acylcarnitines       | 37                    |
| Alkaloids            | 1                     |
| Aminoacids           | 20                    |
| Aminoacids Related   | 19                    |
| Bile Acids           | 1                     |
| Biogenic Amines      | 6                     |
| Carboxylic Acids     | 1                     |
| Ceramides            | 14                    |
| Cholesterol Esters   | 2                     |
| Diacylglycerols      | 6                     |
| Fatty Acids          | 3                     |
| Glycerophospholipids | 81                    |
| Glycosylceramides    | 11                    |
| Indoles Derivatives  | 1                     |
| Nucleobases Related  | 2                     |
| Sphingolipids        | 14                    |
| Sugars               | 1                     |
| Triacylglycerols     | 39                    |
| Vitamins & Cofactors | 1                     |

**39 common to blood, brain and kidney**

| Amino acids (20) | Amino acid-related (19) |
|------------------|-------------------------|
| Ala              | 1-Met-His               |
| Arg              | 3-Met-His               |
| Asn              | 5-AVA                   |
| Asp              | AABA                    |
| Cys              | ADMA                    |
| Gln              | alpha-AAA               |
| Glu              | Anserine                |
| Gly              | Betaine                 |
| His              | Carnosine               |
| Ile              | Cit                     |
| Leu              | Creatinine              |
| Lys              | Cystine                 |
| Met              | HArg                    |
| Phe              | HCys                    |
| Pro              | Orn                     |
| Ser              | ProBetaine              |
| Thr              | SDMA                    |
| Trp              | t4-OH-Pro               |
| Tyr              | Taurine                 |
| Val              |                         |

# Suppl. Figure S4

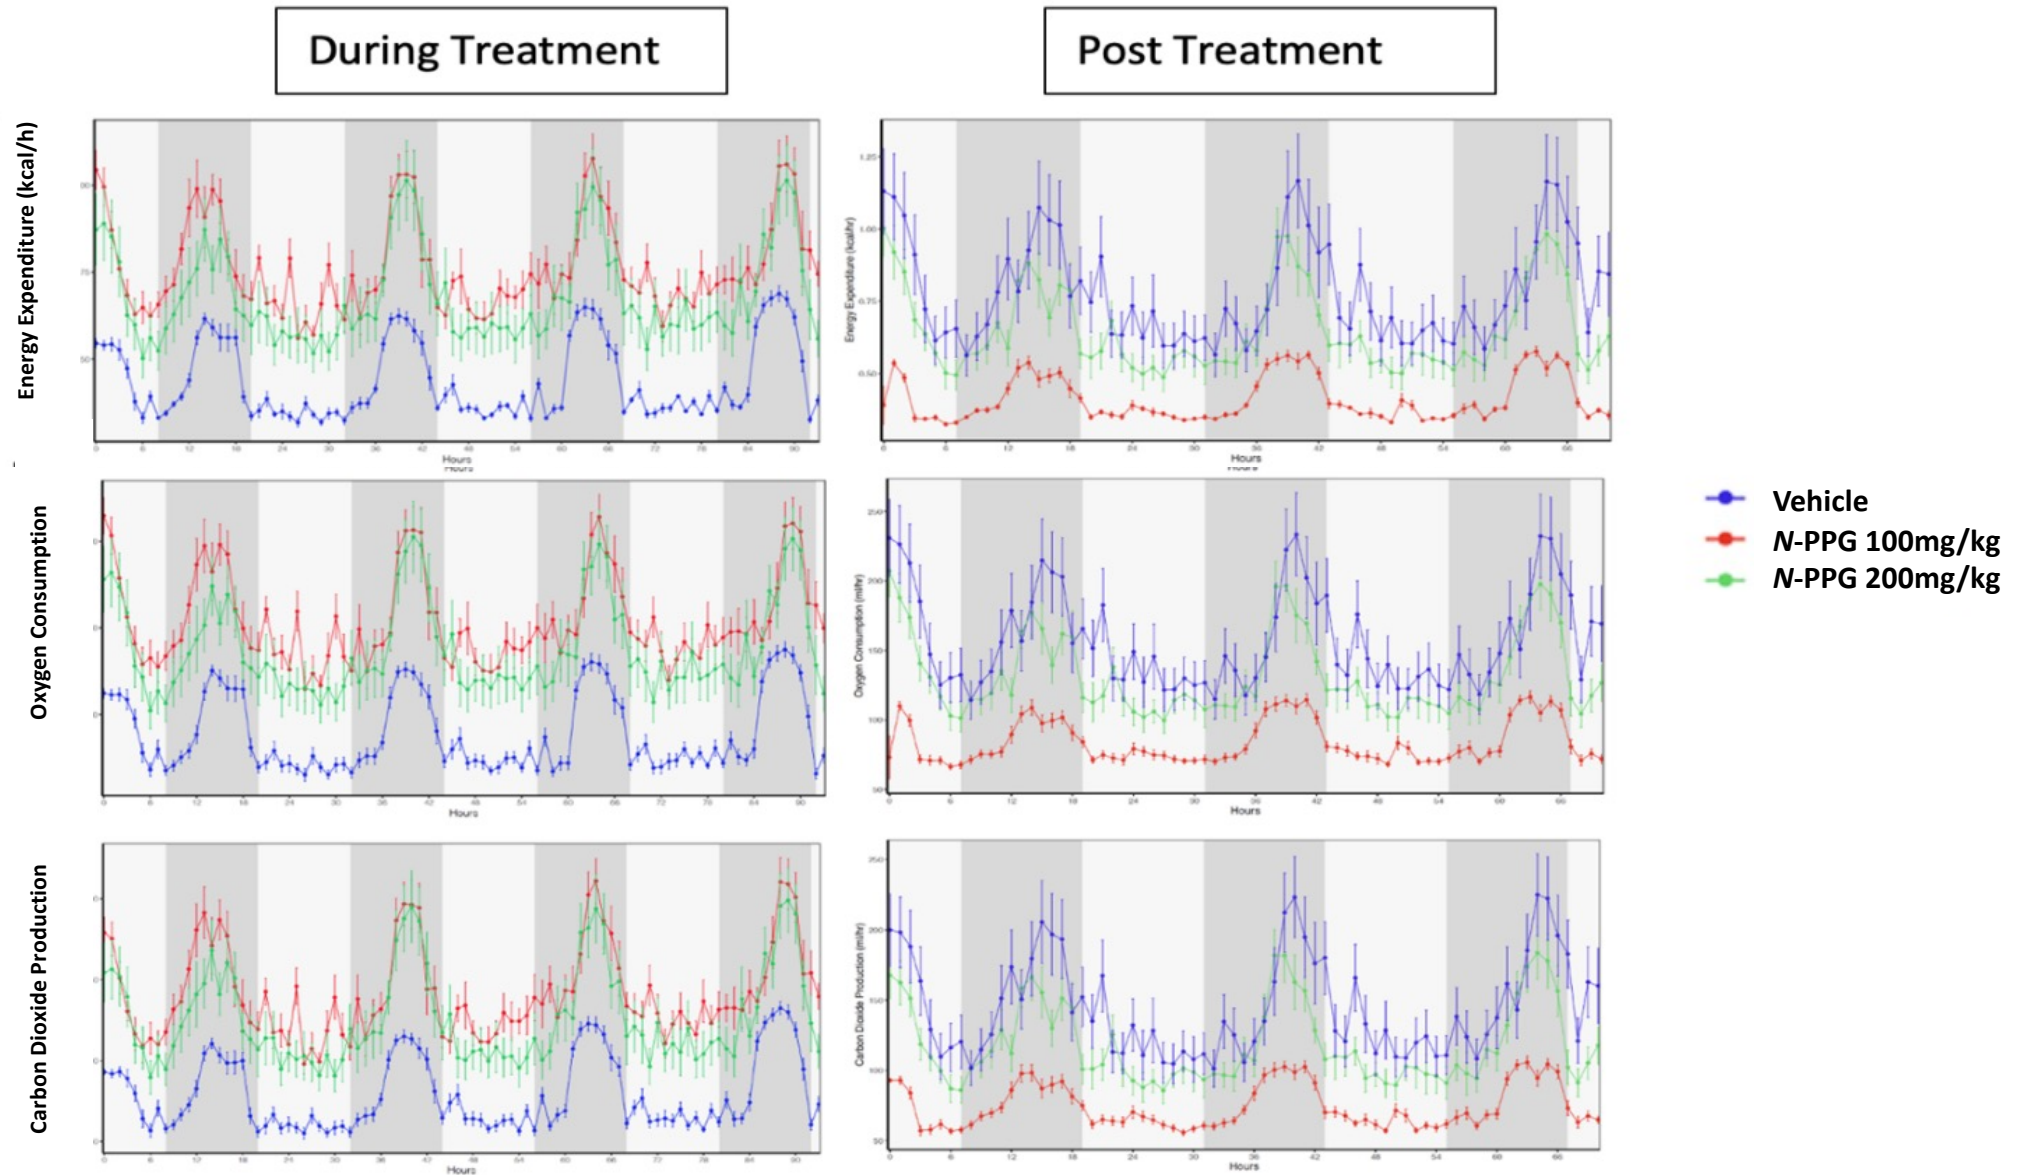

# Suppl. Figure S5

## Blood

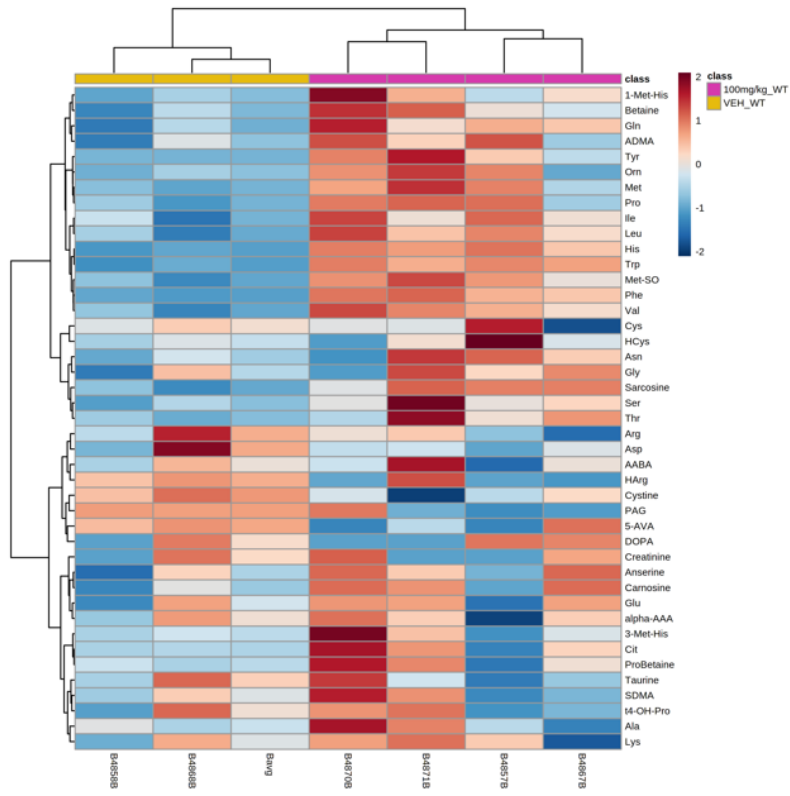

## Brain/cerebellum

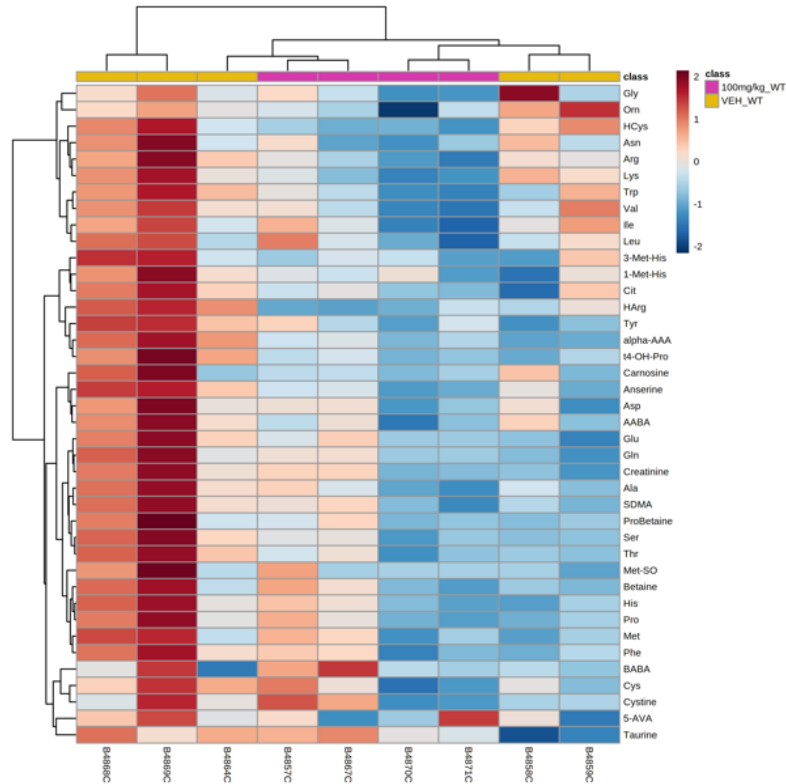

## Kidney

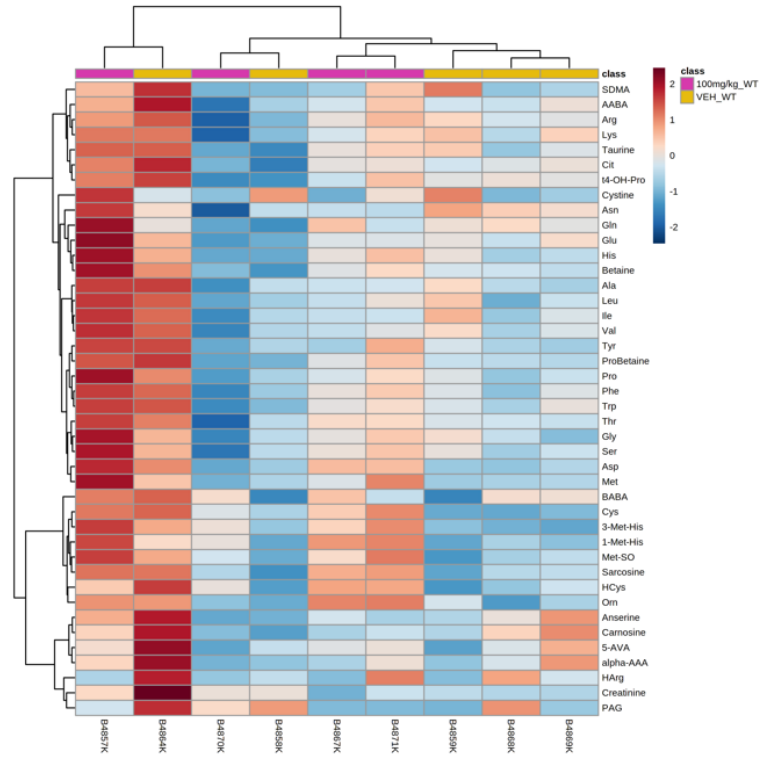

100 mg/kg \_ WT  
VEH \_ WT
